# Supplementary material for: A Field Evidence Model: How to Predict Transport in a Heterogeneous Aquifers at Low Investigation Level?
Source: Copernicus journal article supplement (doi:10.5194/hess-2020-30), 2020-02-10
Supplement: Supplementary file 1 [file hess-2020-30-supplement.pdf]

# Supporting Information on "A Field Evidence Model: How to Predict Transport in a Heterogeneous Aquifers at Low Investigation Level?"

Alraune Zech, Peter Dietrich, Sabine Attinger, Georg Teutsch

January 21, 2020

## Overview on Field Data at MADE site

Table 1: Summary of observation data on hydraulic conductivity at MADE site with number of campaigns in brackets.

| Method of Measurement                                 | References                                                                                                               |
|-------------------------------------------------------|--------------------------------------------------------------------------------------------------------------------------|
| Groundwater level monitoring (1)                      | <i>Boggs et al.</i> [1990]                                                                                               |
| Soil Sampling (2)                                     | <i>Boggs et al.</i> [1990]; <i>Rehfeldt et al.</i> [1992]; <i>Bianchi et al.</i> [2011b]                                 |
| Pumping Tests (1)                                     | <i>Boggs et al.</i> [1990]                                                                                               |
| Slug tests (1)                                        | <i>Boggs et al.</i> [1990]                                                                                               |
| Packer Tests (1)                                      | <i>Boggs et al.</i> [1990]                                                                                               |
| Permeameter Tests (1)                                 | <i>Boggs et al.</i> [1990]                                                                                               |
| Borehole Flowmeter (3)                                | <i>Rehfeldt et al.</i> [1989]; <i>Boggs et al.</i> [1990, 1993, 1995]                                                    |
| DPIL, DPP (2)                                         | <i>Liu et al.</i> [2009]; <i>Bohling et al.</i> [2012]                                                                   |
| Surface Geophysics (2)                                | <i>Boggs et al.</i> [1990]; <i>Bowling et al.</i> [2005]                                                                 |
| Natural Gradient Tracer Test (MADE-1, MADE-2, MADE-3) | <i>Boggs et al.</i> [1992]; <i>Rehfeldt et al.</i> [1992]; <i>Boggs et al.</i> [1993, 1995]; <i>Julian et al.</i> [2001] |
| Force Gradient Tracer Test (MADE-4, MADE-5)           | <i>Liu et al.</i> [2010]; <i>Bianchi et al.</i> [2011a]                                                                  |

## Details on Hydraulic Conductivity Structure A

Module (A) for MADE comprises of two deterministic zones whose presence is indicated by the piezometric surface map (Figure 1a) and two large scale pumping tests (Figure 3a) [*Boggs et al.*, 1992]. Zone  $Z_1$  is an area of low conductivity from upstream of the tracer input location to  $x = 20$  m downstream with a specific mean value of  $\bar{K}_{Z_1} = 2e - 6$  m/s. Zone  $Z_2$  is a high-

13 in-the-average conductivity area upstream beyond 20 m from the source location with a mean  
 14 conductivity of  $\bar{K}_{Z2} = 2e - 4$  m/s.

15 The value of  $\bar{K}_{Z2}$  is the outcome of a large scale pumping test [Boggs *et al.*, 1990]. The test  
 16 was performed about 60 m downstream of the source location within the distribution area of  
 17 the tracer plume (Figure 3a). Conductivity estimates for different observation wells reveal little  
 18 spread. Thus, the test's support area is of relatively uniform high conductivity.

19 The conductivity in zone  $Z_1$  is critical because the value in the vicinity of the tracer injection  
 20 area determines the early plume development. Boggs *et al.* [1990] reported a mean conductivity  
 21 of  $2e - 5$  m/s for a large scale pumping test AT1 which was performed about 90 m upstream of  
 22 the source location (Figure 3a), thus outside of the tracer distribution area. The conductivity  
 23 values from the individual observations wells show a large spread indicating strong heterogeneity  
 24 within this area. Furthermore, pumping tests tend to emphasize the impact of high conductivity  
 25 areas, possibly overestimating the mean conductivity.

26 Since the tracer injection site is not located within the support volume of the pumping tests  
 27 AT1, we consider additional data taken during tracer injection. Water levels were monitored  
 28 manually in the injection wells and seven observation wells close to the source [Boggs *et al.*,  
 29 1990]. A pressure head increase of more then 0.5 m up to 0.64 m was observed in all injection  
 30 wells. Combining the head increase with the mean injection rate of  $Q_{in} = 1.15e - 5$  m<sup>3</sup>/s indicates  
 31 a conductivity of  $\bar{K}_{Z1} = 2e - 6$  m/s in the source area.

## 32 **Details on Flow and Transport Model Settings**

33 The simulation domain is a 2D cross section within  $x \in [-20, 200]$  m and  $z \in [52, 62]$  m generously  
 34 comprising the area of the MADE-1 tracer experiment [Boggs *et al.*, 1992]. The grid has a  
 35 resolution of  $\Delta x = 0.25$  m and  $\Delta z = 0.05$  m. The temporal resolution is one day. Flow boundary  
 36 conditions are no flow at top and bottom of the domain and a constant head of  $h = 63$  m at the  
 37 left and  $h = 62.34$  m at the right, resulting in mean had gradient of  $J = 0.003$ . The porosity was  
 38 set to 0.32.

39 The tracer input takes place at a central injection well located at  $x = 0$  with a screen of 0.6 m  
 40 length at  $z \in [57.2, 57.8]$  m. Tracer was injected over 48.5 h with forced input conditions of an  
 41 injection rate of  $Q_{in} = 1.166e - 5$  m<sup>3</sup>/s.

## 43 **Details on Parametric Uncertainty for Binary Structure A+B**

44 Figure 1 shows the longitudinal mass distributions for different combination of input parameters  
 45 for the binary inclusion structure (A+B). Within every panel, one parameter was varied in com-  
 46 parison to the standard parameter choice of  $K_{Z1} = 2e - 6$  m/s;  $K_{Z2} = 2e - 4$  m/s;  $p = 15\%$ ;  
 47  $I_l = 10$  m;  $I_v = 0.5$  m  $x_I = 20$  m.

48 The inclusion length and the choice of the  $K$  contrast between the zones show the highest impact.  
 49 The later was to be expected as the mean conductivity determines the average flow velocity and  
 50 thus the peak location and the general distribution shape.

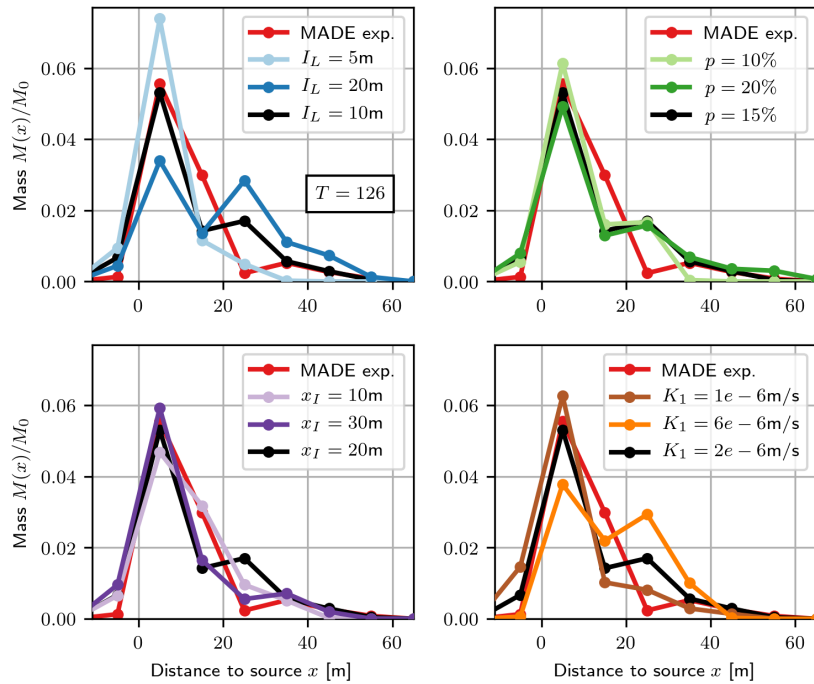

Figure 1: Mass distribution at  $T = 126$  days for conductivity concept (A+B), inclusions in zones for various input parameter combinations: for inclusion length  $I_L$ , amount of inclusions  $p$ , distance of zone interface  $x_I$  to source location and mean conductivity  $K_1$  of zone  $Z_1$  (source area). MADE experiment observations in red.

51 The horizontal inclusion length  $I_h$  determines the connectivity of the source area to the high  
 52 conductivity zone. Thus, the larger  $I_h$  the higher is the amount of mass transported downstream,  
 53 visible a the lower mass peak value at  $x = 5$ ,m and higher second peak at  $x = 25$ ,m for  $I_h = 20$  m  
 54 in Figure 1a. The uncertainty bands in Figures 6b and 7 (main paper) coincide with the upper  
 55 and lower range given by the ensemble results for  $I_h = 5$  m and  $I_h = 20$  m.

56 Other parameters as the distance of the interface to the injection location  $x_I$  (Figure 1c), the  
 57 amount of inclusion  $p$  (Figure 1b) as well as the vertical inclusion length  $I_v$  have minor effects.  
 58 Similarly, the choice of sub-scale heterogeneity parameters is secondary since the inclusion struc-  
 59 ture dominates the mass distribution. We tested values up to  $\sigma^2 = 2$  and found nearly no  
 60 difference to the results of the standard setting for the conductivity concept (A+B+C).

61 In general, all parameter combinations within the value ranges determined for MADE (section ??)  
 62 show a similar mass distribution pattern. In this regard, the binary structure is very stable  
 63 towards parametric uncertainty.

## 64 References

- 65 Bianchi, M., C. Zheng, G. R. Tick, and S. M. Gorelick, Investigation of Small-Scale Preferential  
 66 Flow with a Forced-Gradient Tracer Test, *Ground Water*, 49(4), 503–514, doi:10.1111/j.1745-  
 67 6584.2010.00746.x, 2011a.
- 68 Bianchi, M., C. Zheng, C. Wilson, G. R. Tick, G. Liu, and S. M. Gorelick, Spatial connectivity

- 69 in a highly heterogeneous aquifer: From cores to preferential flow paths, *Water Resour. Res.*,  
70 47(5), W05,524, doi:10.1029/2009WR008966, 2011b.
- 71 Boggs, J. M., S. Young, D. Benton, and Y. Chung, Hydrogeologic Characterization of the MADE  
72 Site, *Tech. Rep. EN-6915*, EPRI, Palo Alto, CA, 1990.
- 73 Boggs, J. M., S. C. Young, L. M. Beard, L. W. Gelhar, K. R. Rehfeldt, and E. E. Adams, Field  
74 study of dispersion in a heterogeneous aquifer: 1. Overview and site description, *Water Resour.*  
75 *Res.*, 28(12), 3281–3291, doi:10.1029/92WR01756, 1992.
- 76 Boggs, J. M., L. M. Beard, W. Waldrop, T. B. Stauffer, W. G. MacIntyre, and C. P. Antworth,  
77 Transport of Tritium and Four Organic Compounds During a Natural-Gradient Experiment  
78 (MADE-2), *Tech. Rep. TR-101998*, EPRI, Palo Alto, CA, 1993.
- 79 Boggs, J. M., J. Schroeder, and S. Young, Data to support model development for natural at-  
80 tenuation study, *Tech. Rep. WR28-2-520-197*, TVA Engineering Laboratory, Tennessee Valley  
81 Authority, Norris, Tennessee, 1995.
- 82 Bohling, G. C., G. Liu, S. J. Knobbe, E. C. Reboulet, D. W. Hyndman, P. Dietrich, and J. J. But-  
83 ler, Geostatistical analysis of centimeter-scale hydraulic conductivity variations at the MADE  
84 site, *Water Resour. Res.*, 48, W02,525, doi:10.1029/2011WR010791, 2012.
- 85 Bowling, J. C., A. B. Rodriguez, D. L. Harry, and C. Zheng, Delineating alluvial aquifer het-  
86 erogeneity using resistivity and GPR data, *Ground Water*, 43(6), 890–903, doi:10.1111/j.1745-  
87 6584.2005.00103.x, 2005.
- 88 Julian, H. E., J. M. Boggs, C. Zheng, and C. E. Feehley, Numerical simulation of a natural  
89 gradient tracer experiment for the natural attenuation study: Flow and physical transport,  
90 *Ground Water*, 39(4), 534–545, doi:10.1111/j.1745-6584.2001.tb02342.x, 2001.
- 91 Liu, G., J. J. Butler, G. C. Bohling, E. Reboulet, S. Knobbe, and D. W. Hyndman, A new  
92 method for high-resolution characterization of hydraulic conductivity, *Water Resour. Res.*,  
93 45(8), W08,202, doi:10.1029/2009WR008319, 2009.
- 94 Liu, G., C. Zheng, G. R. Tick, J. J. Butler, and S. M. Gorelick, Relative importance of dispersion  
95 and rate-limited mass transfer in highly heterogeneous porous media: Analysis of a new tracer  
96 test at the Macrodispersion Experiment (MADE) site, *Water Resour. Res.*, 46(3), W03,524,  
97 doi:10.1029/2009WR008430, 2010.
- 98 Rehfeldt, K. R., P. Hufschmied, L. W. Gelhar, and M. Schaefer, Measuring hydraulic conductivity  
99 with the borehole flowmeter, *Tech. Rep. EN-6511*, EPRI, Palo Alto, CA, 1989.
- 100 Rehfeldt, K. R., J. M. Boggs, and L. W. Gelhar, Field study of dispersion in a heterogeneous  
101 aquifer: 3. Geostatistical analysis of hydraulic conductivity, *Water Resour. Res.*, 28(12), 3309–  
102 3324, doi:10.1029/92WR01758, 1992.
